Fig. S1

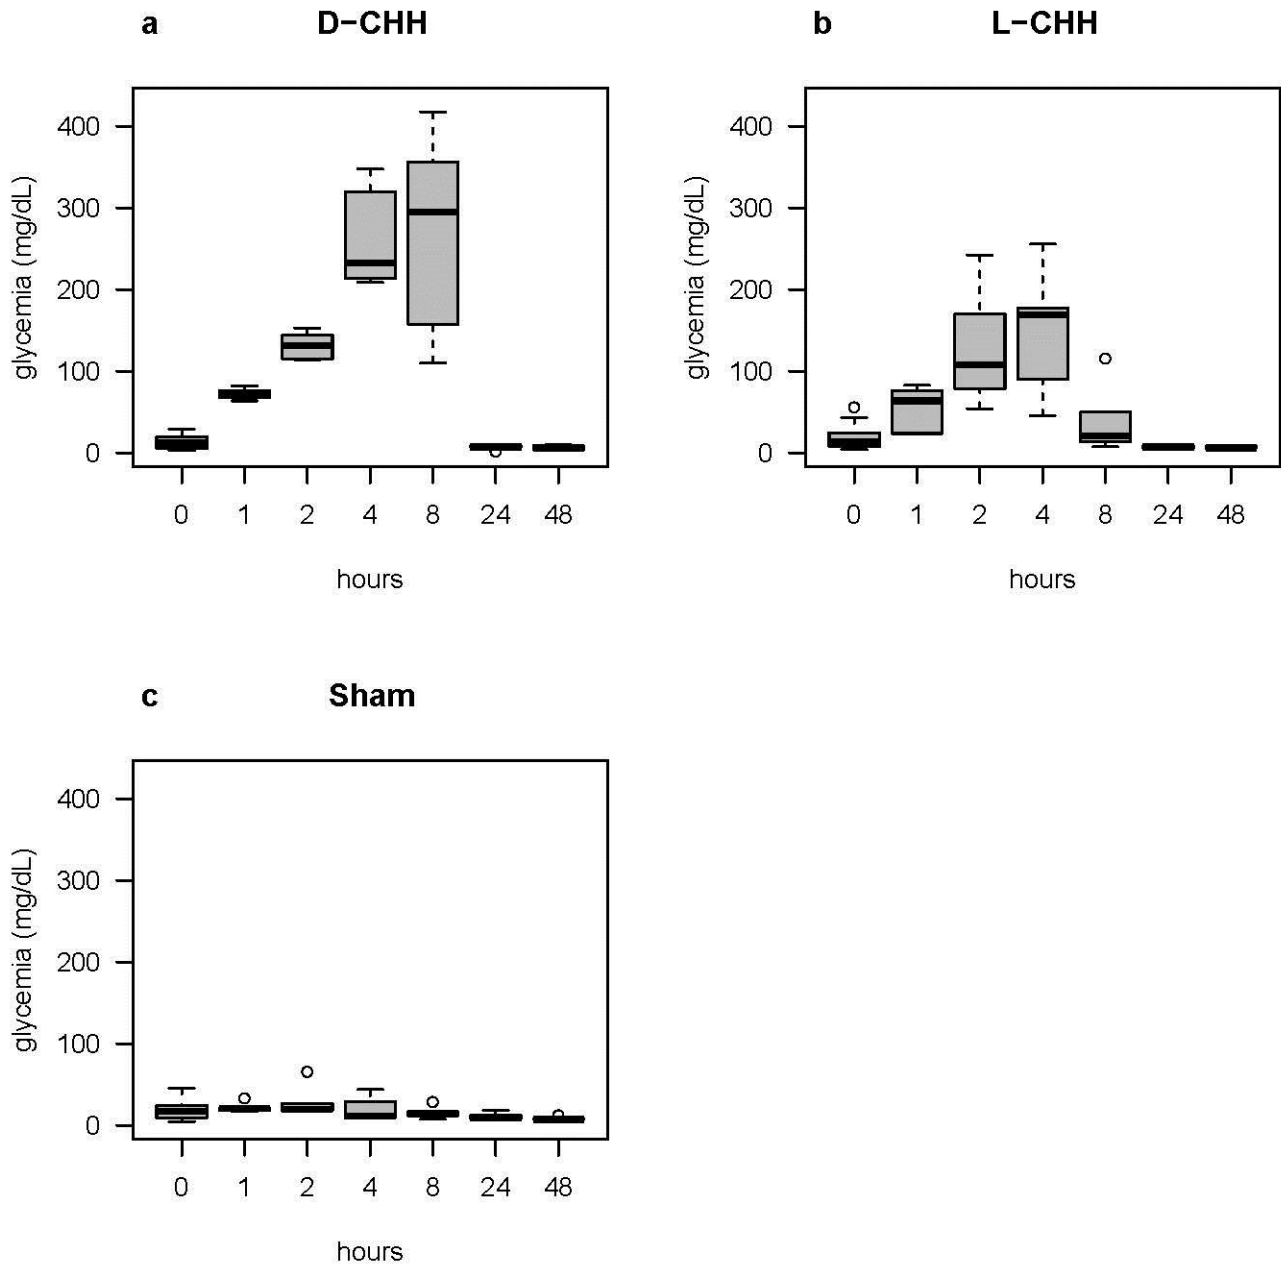

**Fig. S1.** Time course of circulating glucose levels in D- and L-CHH-exposed females, as well as sham-injected ones during 48 hours post-injection in *exp2*. *n*=5 for each experimental and control group.

Fig. S2

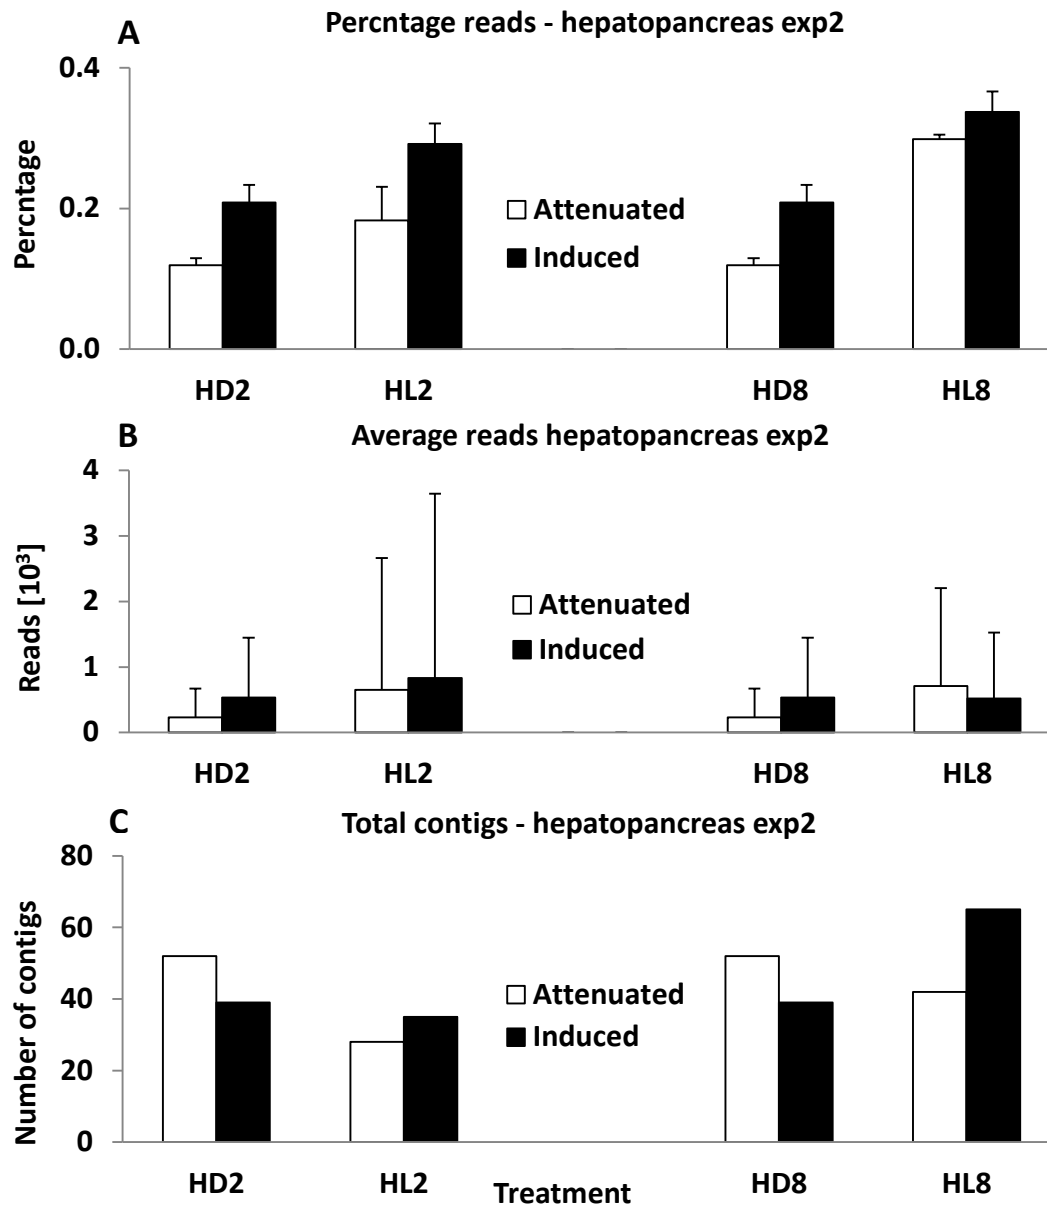

**Fig. S2. Characterization of global differential expression in *exp2*.** Figure descriptions as in Fig. 2. Treatment designation is composed of H-hepatopancreas, D and L for D-CHH and L-CHH affected females, respectively and 2 and 8 for the duration of exposure in hours.

**Fig. S3**

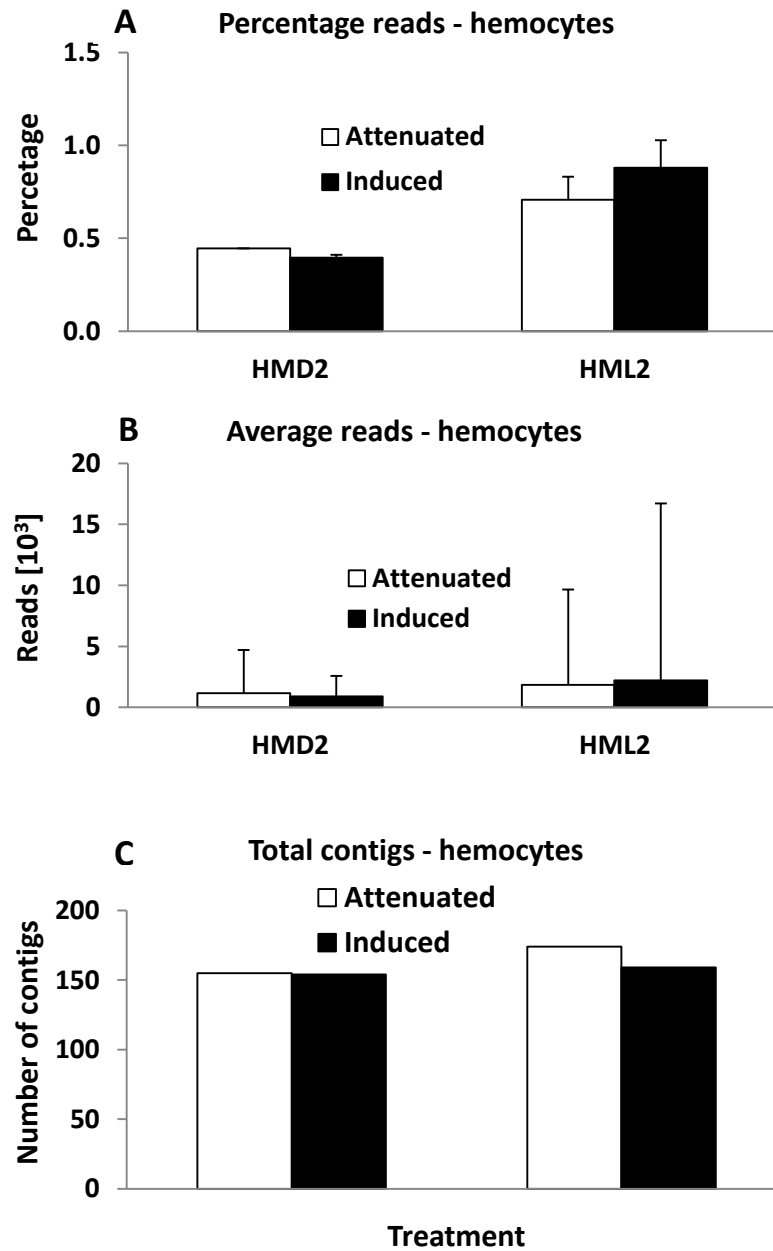

**Fig. S3. Characterization of global differential expression in hemocytes (*exp2*).** Figure descriptions as in Fig. 2. Treatment designation is composed of HM-hemocytes, D and L for D-CHH and L-CHH affected females, respectively and 2 stands for the duration of exposure in hours.

**Fig. S4**

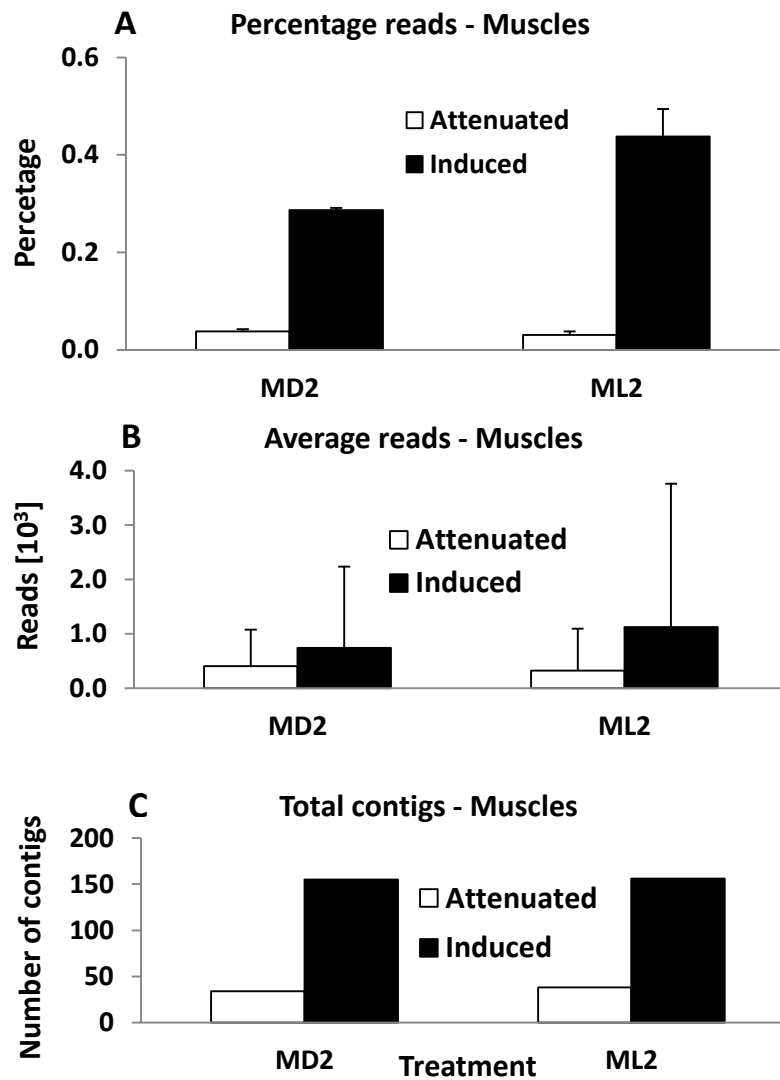

**Fig. S4. Characterization of global differential expression in muscle (*exp2*).** Figure descriptions as in Fig. 2. Treatment designation is composed of M-muscle, D and L for D-CHH and L-CHH affected females, respectively and 2 stands for the duration of exposure in hours.

Table S1.

[Download Table S1](#)
